# Supplementary material for: In silico λ-dynamics predicts protein binding specificities to modified RNAs
Source: PubMed Central journal article supplement — bioRxiv. 2024 Jan 27:2024.01.26.577511. Preprint. [Version 1] doi: 10.1101/2024.01.26.577511 (PMC10849657; doi:10.1101/2024.01.26.577511), 2024-01-27

566 **Supplemental Figure Captions**

567 **Table S1.** Data collection and refinement statistics for the inosine and m<sup>6</sup>A antibody crystal  
568 structures.

569  
570 **Table S2.** Complete table of  $\lambda$ -dynamics results for inosine antibody screening with the RNA  
571 library. RNA chemical structures available in **Fig S3**. Relative binding free energy,  $\Delta\Delta G_{\text{bind}}$ .  
572 Standard deviation,  $\pm\sigma$ . Unbound, u.b. Not specified due to bad sampling, n.s. Entries  
573 corresponding to favorable modifications ( $\Delta\Delta G_{\text{bind}} \leq -0.7$  kcal/mol) are emphasized in bold italics.  
574 Patch name from Xu et al., 2016.

575  
576 **Table S3.** Complete table of  $\lambda$ -dynamics results for m<sup>6</sup>A antibody screening with the RNA library.  
577 RNA chemical structures available in **Fig S3**. Relative binding free energy,  $\Delta\Delta G_{\text{bind}}$ . Standard  
578 deviation,  $\pm\sigma$ . Unbound, u.b. Not specified due to bad sampling, n.s. Entries corresponding to  
579 favorable modifications ( $\Delta\Delta G_{\text{bind}} \leq -0.7$  kcal/mol) are emphasized in bold italics. Patch name from  
580 Xu et al., 2016.

581  
582 **Fig S1.** A previously published poly-inosine antibody has a large binding pocket that may  
583 accommodate multiple nucleobases. Overview (left) and magnified image (right) of the poly-  
584 inosine antibody fragment (PDB ID: 1MRD) binding pocket. An inosine mononucleotide (orange)  
585 was modeled into the missing ligand density (green). Heavy chain residues (H) in dark blue and  
586 light chain residues (L) in light blue. Water molecules substituting for the potential second  
587 mononucleotide are depicted as red spheres, indicating the potential space to bind a second  
588 nucleobase. Interacting amino acids include heavy chain residue Arg96 and light chain residues  
589 Asn28, Asn30, Tyr32, Lys50, and Ser91. The extended binding pocket (red arrow) includes light  
590 chain residue Arg96 and heavy chain residues Gln35, Trp47, Glu50, and Asn58.

591  
592 **Fig S2.** Crystal structure of the m<sup>6</sup>A Fab apo- form to 2.05 Å (PDB ID: 8TCA). Critical binding  
593 pocket amino acids discussed in the main text are labeled. Heavy chain residues (H) are  
594 represented in dark blue, light chain residues (L) in light blue, and waters as red spheres. Depicted  
595 binding pocket amino acids match those of the m<sup>6</sup>A Fab holo- form (**Fig 1A**).

596  
597 **Fig S3.** Chemical library of ribonucleoside bases. The library includes the 4 canonical  
598 ribonucleobases (A, C, G, and U) and 44 naturally occurring modified derivatives (12 As, 6 Cs, 8  
599 Gs, and 18 Us). Differences between each modification and its respective canonical base are  
600 highlighted in green.

601  
602 **Fig S4.** Molecular dynamics simulation movie example of the m<sup>6</sup>A antibody with a bound  
603 nucleoside target. The m<sup>6</sup>A Fab binds tightly to m<sup>6</sup><sub>2</sub>A. Movie made in Pymol (Schrödinger, Inc.).

604  
605 **Fig S5.** Molecular dynamics simulation movie example of the m<sup>6</sup>A antibody with an unbinding  
606 nucleoside target. The m<sup>6</sup>A Fab unbinds from uridine. Movie made in Pymol (Schrödinger, Inc.).

607  
608 **Fig S6.** Structural models of inosine and m<sup>6</sup>A antibodies bound to representative off-target RNAs.  
609 (A) Magnified binding site of the inosine antibody fragment in complex with uridine. (B-C)  
610 Magnified binding site of the m<sup>6</sup>A antibody fragment in complex with (B) m<sup>6</sup><sub>2</sub>A or (C) adenosine

611 (A). Heavy chain residues (H) are represented in dark blue, light chain residues (L) in light blue,  
612 and the off-target nucleoside in orange. Critical amino acid contacts labeled. **(D-E)** Table of t-test  
613 p-value statistics for **(D)** inosine and **(E)** m<sup>6</sup>A antibody ELISA binding assay results reported in  
614 **Fig 5**. p-values < 0.01 in bold.

**Table S1. Data collection and refinement statistics.**

|                                           | <b>Inosine Fab w/<br/>Inosine (PDB ID:<br/>8SIP)</b>  | <b>m6A Fab only<br/>(PDB ID: 8TCA)</b> | <b>m6A Fab w<br/>ligand (PDB ID:<br/>8VEV)</b> |
|-------------------------------------------|-------------------------------------------------------|----------------------------------------|------------------------------------------------|
| <b>Wavelength</b>                         | 0.9793                                                | 0.9793                                 | 0.8731                                         |
| <b>Resolution<br/>range</b>               | 57.04 - 1.94<br>(2.009 - 1.94)                        | 70 - 2.02 (2.092<br>- 2.02)            | 48.23 - 3.06 (3.18<br>- 3.06)                  |
| <b>Space group</b>                        | P 1                                                   | P 43 21 2                              | P 21 21 21                                     |
| <b>Unit cell</b>                          | 39.8174 49.0903<br>57.3853 83.8419<br>88.8169 89.6813 | 79.906 79.906<br>145.127 90 90 90      | 83.64 128.377<br>150.476 90 90 90              |
| <b>Total reflections</b>                  | 218254 (14586)                                        | 230543 (22581)                         | 203373 (23011)                                 |
| <b>Unique<br/>reflections</b>             | 30888 (2931)                                          | 31198 (2999)                           | 31244 (3399)                                   |
| <b>Multiplicity</b>                       | 7.1 (4.9)                                             | 7.4 (7.3)                              | 6.5 (6.8)                                      |
| <b>Completeness<br/>(%)</b>               | 96.20 (91.25)                                         | 98.24 (96.71)                          | 99.90 (100.00)                                 |
| <b>Mean I/sigma(I)</b>                    | 6.33 (3.17)                                           | 9.71 (1.08)                            | 16.80 (4.00)                                   |
| <b>Wilson B-factor</b>                    | 26.61                                                 | 27.17                                  | 78.19                                          |
| <b>R-merge</b>                            | 0.1901 (1.506)                                        | 0.2183 (2.290)                         | 0.078 (0.416)                                  |
| <b>R-meas</b>                             | 0.2027 (1.642)                                        | 0.2341 (2.466)                         | 0.085 (0.451)                                  |
| <b>R-pim</b>                              | 0.06938 (0.6427)                                      | 0.08188 (0.8885)                       | 0.0330 (0.1720)                                |
| <b>CC1/2</b>                              | 0.991 (0.586)                                         | 0.996 (0.546)                          | 0.998 (0.963)                                  |
| <b>CC*</b>                                | 0.998 (0.86)                                          | 0.999 (0.84)                           | 1.000 (0.990)                                  |
| <b>Reflections used<br/>in refinement</b> | 30804 (2931)                                          | 31042 (2999)                           | 31207 (3391)                                   |
| <b>Reflections used<br/>for R-free</b>    | 1554 (154)                                            | 1543 (162)                             | 1307 (142)                                     |
| <b>R-work</b>                             | 0.2043 (0.2460)                                       | 0.1807 (0.3043)                        | 0.2238 (0.3156)                                |
| <b>R-free</b>                             | 0.2454 (0.2914)                                       | 0.2238 (0.3201)                        | 0.2531 (0.3100)                                |

|                                     |               |               |               |
|-------------------------------------|---------------|---------------|---------------|
| <b>CC(work)</b>                     | 0.947 (0.722) | 0.968 (0.777) | 0.928 (0.846) |
| <b>CC(free)</b>                     | 0.929 (0.494) | 0.952 (0.735) | 0.896 (0.865) |
| <b>Number of non-hydrogen atoms</b> | 3531          | 3562          | 9807          |
| <b>macromolecules</b>               | 3277          | 3239          | 9649          |
| <b>ligands</b>                      | 19            | 36            | 108           |
| <b>solvent</b>                      | 235           | 287           | 50            |
| <b>Protein residues</b>             | 426           | 425           | 1267          |
| <b>RMS(bonds)</b>                   | 0.008         | 0.009         | 0.002         |
| <b>RMS(angles)</b>                  | 1.10          | 1.18          | 0.56          |
| <b>Ramachandran favored (%)</b>     | 97.62         | 97.61         | 95.34         |
| <b>Ramachandran allowed (%)</b>     | 2.38          | 2.39          | 4.58          |
| <b>Ramachandran outliers (%)</b>    | 0.00          | 0.00          | 0.08          |
| <b>Rotamer outliers (%)</b>         | 0.80          | 0.54          | 0.09          |
| <b>Clashscore</b>                   | 6.46          | 1.70          | 2.09          |
| <b>Average B-factor</b>             | 32.66         | 33.80         | 91.07         |
| <b>macromolecules</b>               | 32.19         | 33.22         | 91.26         |
| <b>ligands</b>                      | 32.70         | 53.08         | 81.28         |
| <b>solvent</b>                      | 39.15         | 37.94         | 75.58         |
| <b>Number of TLS groups</b>         | 1             | 9             | 6             |

Statistics for the highest-resolution shell are shown in parentheses.

Table S2

**Table S2:** Relative binding free energies for inosine Fab screening.

| Modified Base                        | Patch Name | $\Delta\Delta G_{\text{bind}}$ | $\pm \sigma$ |
|--------------------------------------|------------|--------------------------------|--------------|
| A                                    | ADE        | -0.112                         | 0.172        |
| $m^2A$                               | 2MA        | u.b.                           | u.b.         |
| $m^6A$                               | 6MA        | 1.726                          | 0.186        |
| $m^6_2A$                             | M6A        | 0.605                          | 0.231        |
| $m^8A$                               | 8MA        | 2.721                          | 0.389        |
| $m^1I$                               | 1MI        | 0.783                          | 0.138        |
| I                                    | INO        | 0.089                          | 0.024        |
| $ms^2m^6A$                           | SMA        | -0.037                         | 0.335        |
| $ac^6A$                              | 6AA        | u.b.                           | u.b.         |
| $i^6A$                               | 6IA        | n.s.                           | n.s.         |
| $ms^2i^6A$                           | MIA        | 0.598                          | 0.352        |
| $ms^2io^6A$                          | SIA        | u.b.                           | u.b.         |
| $io^6A$                              | HIA        | 1.868                          | 0.389        |
| G                                    | GUA        | -0.642                         | 0.134        |
| $m^1G$                               | 1MG        | u.b.                           | u.b.         |
| $m^2G$                               | 2MG        | 0.286                          | 0.168        |
| $m^2_2G$                             | M2G        | 1.057                          | 0.262        |
| <b>preQ0</b>                         | <b>DCG</b> | <b>-1.737</b>                  | <b>0.187</b> |
| <i>imG-14</i>                        | DWG        | -0.005                         | 0.319        |
| <i>imG</i>                           | IMG        | u.b.                           | u.b.         |
| <b>imG2</b>                          | <b>IWG</b> | <b>-1.164</b>                  | <b>0.331</b> |
| <i>mimG</i>                          | MWG        | u.b.                           | u.b.         |
| <b>U</b>                             | <b>URA</b> | <b>-0.926</b>                  | <b>0.145</b> |
| D                                    | H2U        | u.b.                           | u.b.         |
| <b>mo<sup>5</sup>U</b>               | <b>MOU</b> | <b>-1.656</b>                  | <b>0.199</b> |
| $m^5s^2U$                            | 52U        | u.b.                           | u.b.         |
| $m^5D$                               | MDU        | 0.707                          | 0.161        |
| <b><math>\psi</math></b>             | <b>PSU</b> | <b>-1.985</b>                  | <b>0.490</b> |
| <b><math>m^3\psi</math></b>          | <b>3MP</b> | <b>-1.174</b>                  | <b>0.446</b> |
| $m^3U$                               | 3MU        | -0.146                         | 0.320        |
| <b><math>s^4U</math></b>             | <b>4SU</b> | <b>-1.702</b>                  | <b>0.181</b> |
| <b><math>m^5U</math></b>             | <b>5MU</b> | <b>-1.340</b>                  | <b>0.159</b> |
| <b>ho<sup>5</sup>U</b>               | <b>5HU</b> | <b>-1.613</b>                  | <b>0.162</b> |
| $s^2U$                               | 2SU        | -0.644                         | 0.233        |
| <b><math>m^1\psi</math></b>          | <b>1MP</b> | <b>-0.896</b>                  | <b>0.112</b> |
| <b>cnm<sup>5</sup>U</b>              | <b>CYU</b> | <b>-2.147</b>                  | <b>0.233</b> |
| <b>mcm<sup>5</sup>s<sup>2</sup>U</b> | <b>70U</b> | <b>-1.379</b>                  | <b>0.330</b> |
| <i>mchm<sup>5</sup>U</i>             | CMU        | -0.612                         | 0.381        |
| <b>ncm<sup>5</sup>U</b>              | <b>BCU</b> | <b>-1.683</b>                  | <b>0.393</b> |
| <b>mcm<sup>5</sup>U</b>              | <b>OCU</b> | <b>-1.307</b>                  | <b>0.312</b> |
| <i>mcmo<sup>5</sup>U</i>             | OEU        | -0.491                         | 0.396        |
| C                                    | CYT        | u.b.                           | u.b.         |
| $m^5C$                               | 5MC        | u.b.                           | u.b.         |
| $ac^4C$                              | 4AC        | u.b.                           | u.b.         |
| $m^4C$                               | 4MC        | u.b.                           | u.b.         |
| $f^5C$                               | 5FC        | 0.596                          | 0.265        |
| $hm^5C$                              | HMC        | u.b.                           | u.b.         |
| $s^2C$                               | 2SC        | u.b.                           | u.b.         |

"Patch Name" = 3-letter name assigned by Xu et al. (2016)

Modifications with  $\Delta\Delta G \leq -0.7$  kcal/mol in bold italics.

Table S3

**Table S3:** Relative binding free energies for m<sup>6</sup>A Fab screening.

| Modified Base                                   | Patch Name | $\Delta\Delta G_{\text{bind}}$ | $\pm \sigma$ |
|-------------------------------------------------|------------|--------------------------------|--------------|
| A                                               | ADE        | 0.300                          | 0.165        |
| <i>m</i> <sup>2</sup> A                         | 2MA        | 3.084                          | 0.156        |
| <i>m</i> <sup>6</sup> A                         | 6MA        | -0.034                         | 0.032        |
| <b><i>m</i><sup>6</sup><sub>2</sub>A</b>        | <b>M6A</b> | <b>-2.091</b>                  | <b>0.052</b> |
| <i>m</i> <sup>8</sup> A                         | 8MA        | 4.432                          | 0.337        |
| <i>m</i> <sup>1</sup> I                         | 1MI        | n.s.                           | n.s.         |
| I                                               | INO        | 6.247                          | 0.301        |
| <i>ms</i> <sup>2</sup> <i>m</i> <sup>6</sup> A  | SMA        | 2.634                          | 0.209        |
| <b><i>ac</i><sup>6</sup>A</b>                   | <b>6AA</b> | <b>-1.156</b>                  | <b>0.197</b> |
| <i>i</i> <sup>6</sup> A                         | 6IA        | 1.624                          | 0.491        |
| <i>ms</i> <sup>2</sup> <i>i</i> <sup>6</sup> A  | MIA        | 3.587                          | 0.434        |
| <i>ms</i> <sup>2</sup> <i>io</i> <sup>6</sup> A | SIA        | n.s.                           | n.s.         |
| <i>io</i> <sup>6</sup> A                        | HIA        | n.s.                           | n.s.         |
| G                                               | GUA        | 4.881                          | 0.471        |
| <i>m</i> <sup>1</sup> G                         | 1MG        | 3.029                          | 0.521        |
| <i>m</i> <sup>2</sup> G                         | 2MG        | u.b.                           | u.b.         |
| <i>m</i> <sup>2</sup> <sub>2</sub> G            | M2G        | n.s.                           | n.s.         |
| <i>preQ0</i>                                    | DCG        | 4.229                          | 0.283        |
| <i>imG-14</i>                                   | DWG        | u.b.                           | u.b.         |
| <i>imG</i>                                      | IMG        | n.s.                           | n.s.         |
| <i>imG2</i>                                     | IWG        | u.b.                           | u.b.         |
| <b><i>mimG</i></b>                              | <b>MWG</b> | <b>-2.437</b>                  | <b>0.441</b> |
| U                                               | URA        | u.b.                           | u.b.         |
| D                                               | H2U        | 2.841                          | 0.242        |
| <i>mo</i> <sup>5</sup> U                        | MOU        | 1.861                          | 0.459        |
| <i>m</i> <sup>5</sup> <i>s</i> <sup>2</sup> U   | 52U        | 3.817                          | 0.504        |
| <i>m</i> <sup>5</sup> D                         | MDU        | 1.520                          | 0.25         |
| $\psi$                                          | PSU        | 3.564                          | 0.531        |
| <i>m</i> <sup>3</sup> $\psi$                    | 3MP        | n.s.                           | n.s.         |
| <i>m</i> <sup>3</sup> U                         | 3MU        | n.s.                           | n.s.         |
| <i>s</i> <sup>4</sup> U                         | 4SU        | n.s.                           | n.s.         |
| <i>m</i> <sup>5</sup> U                         | 5MU        | 1.270                          | 0.519        |
| <i>ho</i> <sup>5</sup> U                        | 5HU        | 0.965                          | 0.305        |
| <i>s</i> <sup>2</sup> U                         | 2SU        | 2.830                          | 0.705        |
| <i>m</i> <sup>1</sup> $\psi$                    | 1MP        | 3.044                          | 0.663        |
| <i>cnm</i> <sup>5</sup> U                       | CYU        | 2.396                          | 0.282        |
| <i>mcm</i> <sup>5</sup> <i>s</i> <sup>2</sup> U | 70U        | n.s.                           | n.s.         |
| <i>mchm</i> <sup>5</sup> U                      | CMU        | 2.686                          | 0.235        |
| <i>ncm</i> <sup>5</sup> U                       | BCU        | n.s.                           | n.s.         |
| <i>mcm</i> <sup>5</sup> U                       | OCU        | 1.113                          | 0.402        |
| <i>mcmo</i> <sup>5</sup> U                      | OEU        | 3.469                          | 0.527        |
| C                                               | CYT        | 5.033                          | 0.708        |
| <i>m</i> <sup>5</sup> C                         | 5MC        | n.s.                           | n.s.         |
| <b><i>ac</i><sup>4</sup>C</b>                   | <b>4AC</b> | <b>-1.199</b>                  | <b>0.325</b> |
| <i>m</i> <sup>4</sup> C                         | 4MC        | 2.159                          | 0.287        |
| <i>f</i> <sup>5</sup> C                         | 5FC        | 2.275                          | 0.422        |
| <i>hm</i> <sup>5</sup> C                        | HMC        | u.b.                           | u.b.         |
| <i>s</i> <sup>2</sup> C                         | 2SC        | u.b.                           | u.b.         |

"Patch Name" = 3-letter name assigned by Xu et al. (2016)

Modifications with  $\Delta\Delta G \leq -0.7$  kcal/mol in bold italics.

Figure S1

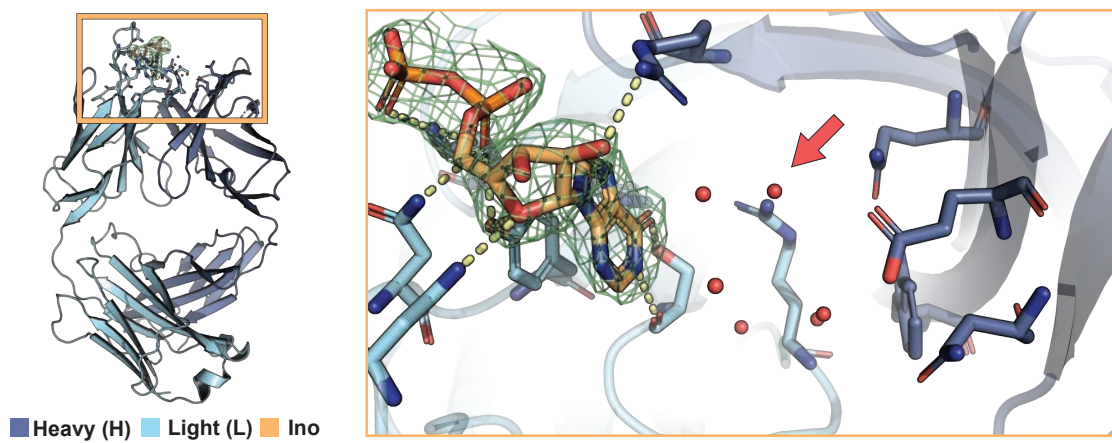

Figure S1

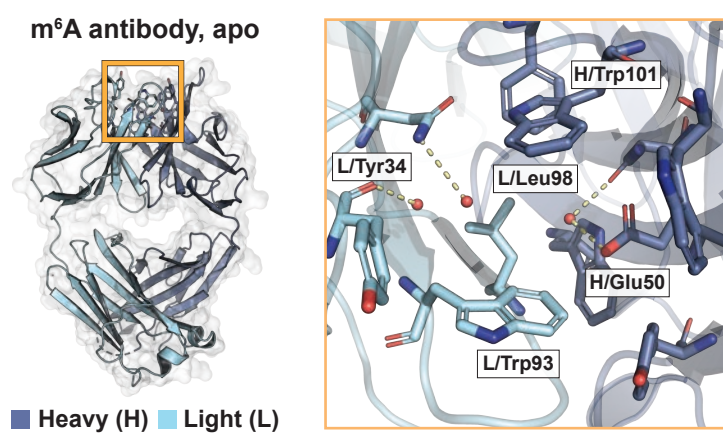



Figure S3

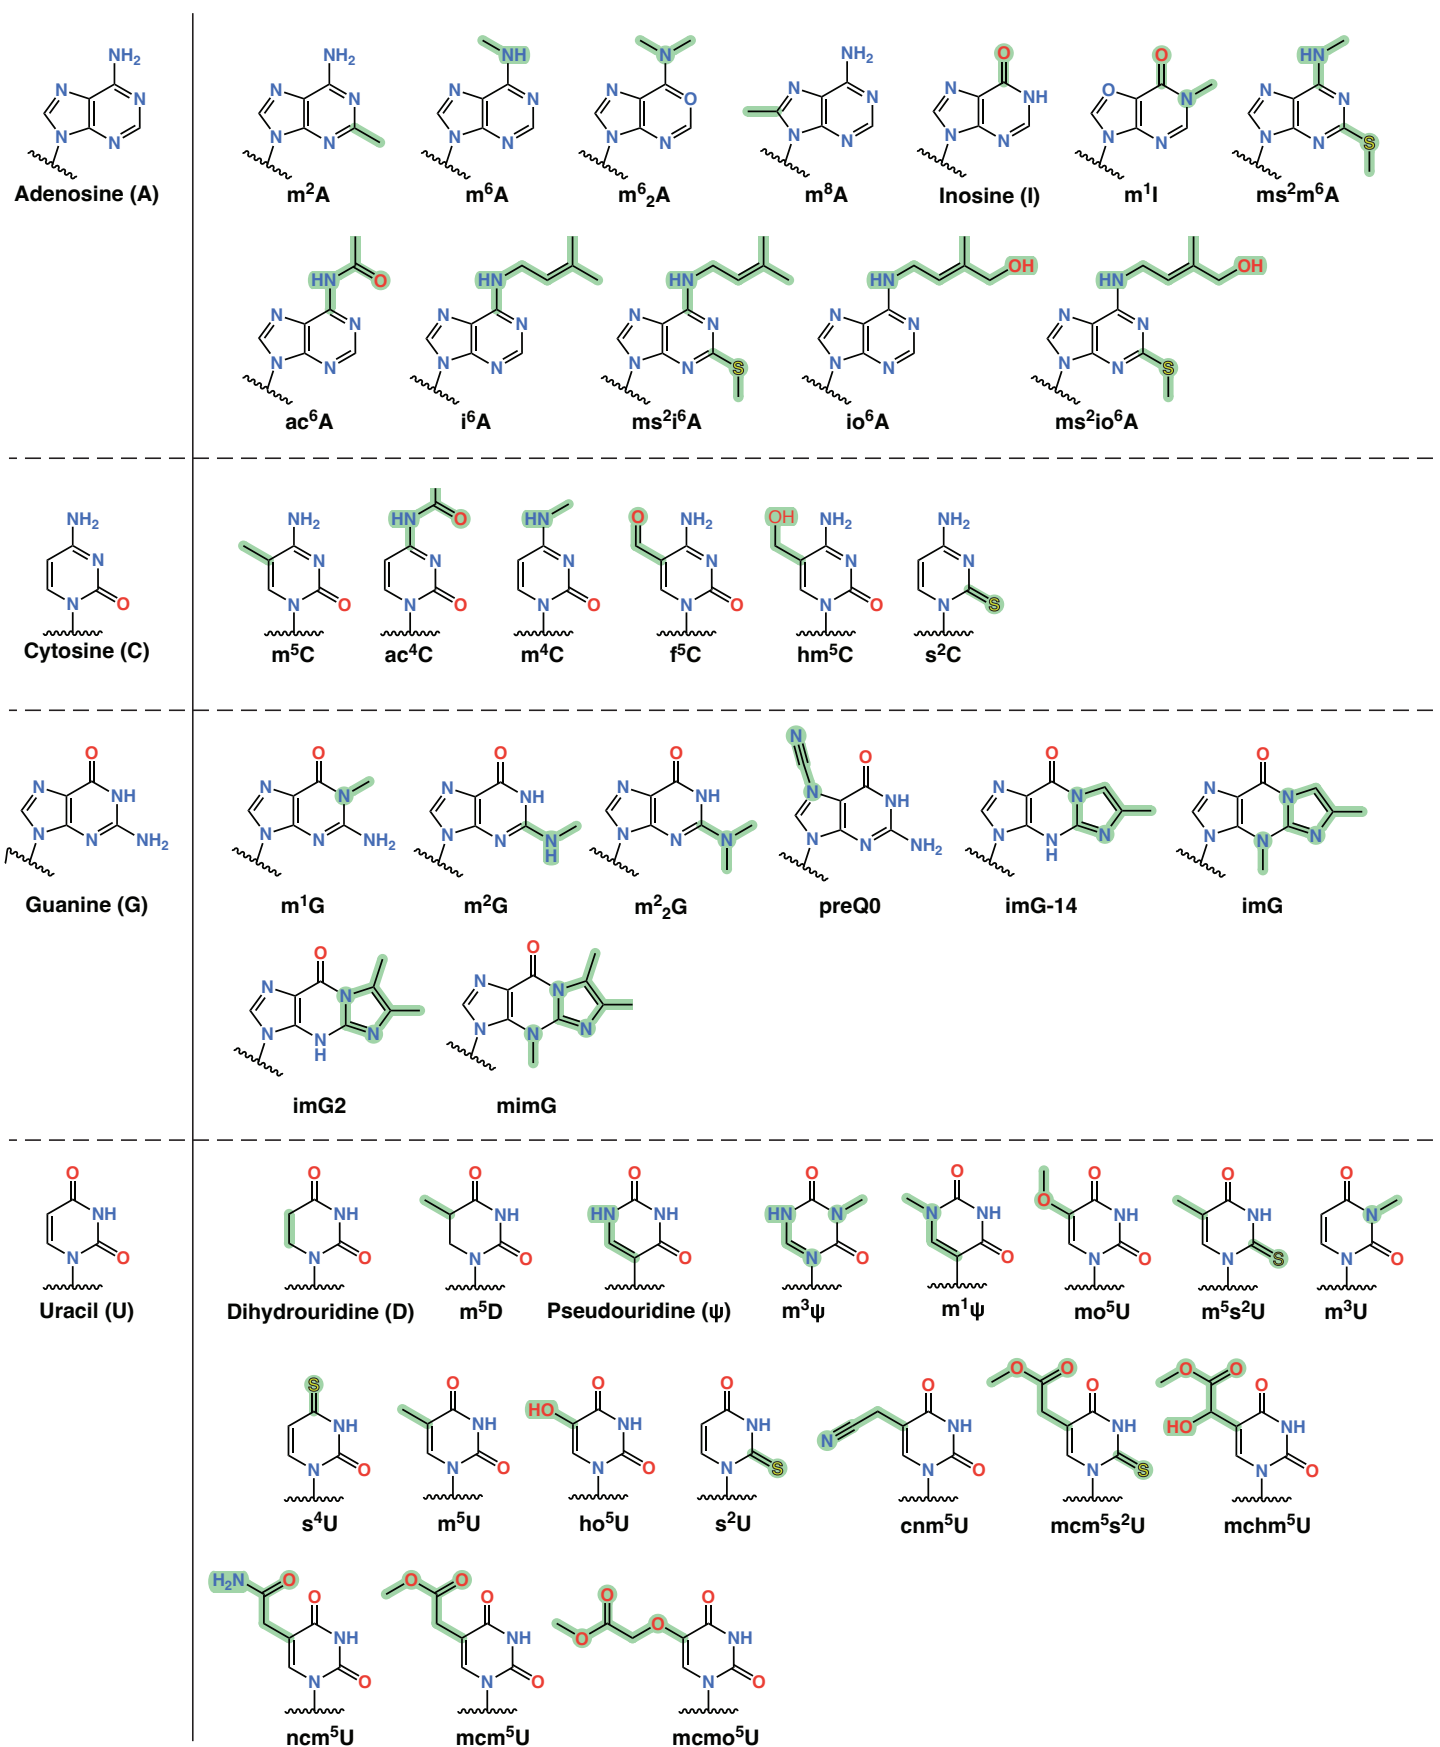

Figure S6

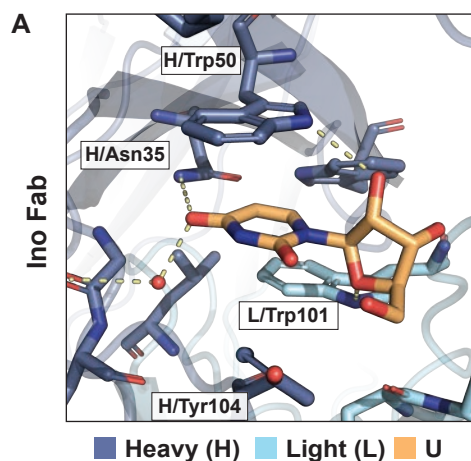

**D** Inosine antibody ELISA results, t-test p values.  $p < 0.01$  in bold italics.

| Concentration (ng/ml) | I vs. C                | U vs. C                | A vs. C   | I vs. U                |
|-----------------------|------------------------|------------------------|-----------|------------------------|
| 1000                  | <b><i>0.008176</i></b> | <b><i>0.000068</i></b> | 0.231657  | 0.022235               |
| 100                   | <b><i>0.005824</i></b> | <b><i>0.000199</i></b> | 0.371234  | <b><i>0.006713</i></b> |
| 10                    | <b><i>0.000112</i></b> | 0.079051               | 0.703358  | <b><i>0.000115</i></b> |
| 1                     | <b><i>0.000376</i></b> | 0.828319               | 0.872158  | <b><i>0.000401</i></b> |
| 0.1000                | 0.030556               | 0.608653               | 0.650652  | 0.032961               |
| 0.0100                | 0.289681               | 0.795255               | >0.999999 | 0.284906               |
| 0.0010                | 0.390739               | 0.366411               | 0.421648  | 0.507010               |
| 0                     | 0.593139               | 0.350393               | 0.507644  | 0.440630               |

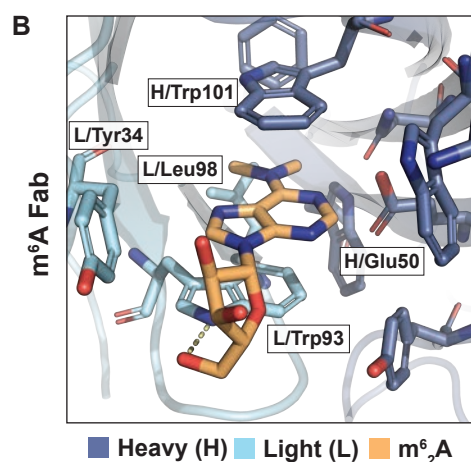

**E** m<sup>6</sup>A antibody ELISA results, t-test p values.  $p < 0.01$  in bold italics.

| Concentration (ng/ml) | m <sup>6</sup> A vs. C | A vs. C                | m <sup>6</sup> <sub>2</sub> A vs. C | m <sup>6</sup> A vs. A |
|-----------------------|------------------------|------------------------|-------------------------------------|------------------------|
| 100                   | <b><i>0.00007</i></b>  | <b><i>0.001121</i></b> | <b><i>0.000043</i></b>              | <b><i>0.004438</i></b> |
| 33.300                | <b><i>0.000017</i></b> | <b><i>0.000294</i></b> | <b><i>0.000005</i></b>              | <b><i>0.001808</i></b> |
| 11.100                | <b><i>0.000034</i></b> | <b><i>0.000209</i></b> | <b><i>0.000024</i></b>              | <b><i>0.005227</i></b> |
| 3.700                 | <b><i>0.000009</i></b> | <b><i>0.000072</i></b> | <b><i>0.000017</i></b>              | <b><i>0.002905</i></b> |
| 1.230                 | <b><i>0.000055</i></b> | <b><i>0.001183</i></b> | <b><i>0.001946</i></b>              | <b><i>0.000026</i></b> |
| 0.412                 | 0.086944               | 0.342808               | 0.080748                            | 0.239781               |
| 0.137                 | 0.723367               | 0.72624                | 0.506021                            | 0.974438               |
| 0                     | 0.799706               | 0.959434               | 0.884815                            | 0.781924               |

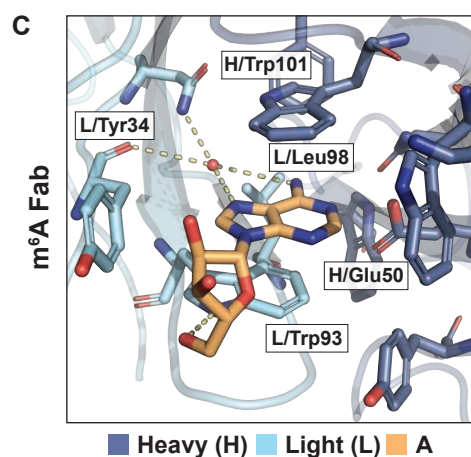

Supplement: NIHPP2024.01.26.577511V1-supplement-1.pdf [file NIHPP2024.01.26.577511V1-supplement-1.pdf]
